# Supplementary material for: SARS-CoV-2 mRNA Vaccine Response in People Living with HIV According to CD4 Count and CD4/CD8 Ratio
Source: MDPI journal article supplement (doi:10.3390/vaccines11111664), 2023-10-30
Supplement: s1 [file s1]

**Supplementary Table S1.** Conversion factors for the different assays used

| Company  | Platform           | Assay                      | Antigen      | Assay Unit | Conversion factor to BAU/mL |
|----------|--------------------|----------------------------|--------------|------------|-----------------------------|
| Abbott   | Alinity /Architect | SARS-CoV-2 (IgG)           | Nucleocapsid | S/CO       | Not available               |
|          |                    | SARS-CoV-2 (IgG) QUANT II  | RBD          | AU/mL      | 0.142                       |
| Roche    | Elecsys            | Anti-SARS-CoV-2            | Nucleocapsid | U/mL       | Not available               |
|          |                    | Anti-SARS-CoV-2 S          | RBD          |            | 1.0288                      |
| MSD      | V-Plex             | SARS-CoV-2 (Spike) (IgG)   | Spike        | AU/mL      | 0.00901                     |
|          |                    | SARS-CoV-2 (RBD) (IgG)     | RBD          |            | 0.0272                      |
|          |                    | SARS-CoV-2 (N) (IgG)       | Nucleocapsid |            | 0.00236                     |
| Diasorin | Liaison            | SARS-CoV-2 TrimericS (IgG) | Spike        | BAU/mL     | Not required                |

**Supplementary Table S2.** Odds Ratio (OR) and Adjusted Odds Ratio (AOR) from fitting a logistic regression model of the probability of failing to achieve a robust/above-average anti-S/RBD response post vaccination VE90% (**Panel A**) and OCOOnAbs (**Panel B**) endpoints after excluding subjects and data quantified with Elecsys Anti-SARS-CoV2 S (Roche)

| Panel A (VE90%)                                               | Unadjusted Odds ratio (95% CI) | p-value | Adjusted* Odds ratio (95% CI) | p-value         | &Type III p-value |
|---------------------------------------------------------------|--------------------------------|---------|-------------------------------|-----------------|-------------------|
| <b>CD4 count at T1</b>                                        |                                |         |                               |                 |                   |
| <i>Fail to achieve VE90% after primary cycle (T3)</i>         |                                |         |                               |                 |                   |
| HCD4                                                          | 1                              |         | 1                             |                 | 0.019             |
| ICD4                                                          | 1.95 (1.43, 2.66)              | <.001   | 1.58 (0.90, 2.76)             | 0.112           |                   |
| LCD4                                                          | 4.50 (2.37, 8.53)              | <.001   | 3.93 (1.37, 11.26)            | <b>0.011</b>    |                   |
| per 1 SD lower (log2 scale)                                   | 1.72 (1.46, 2.03)              | <.001   | 1.76 (1.27, 2.44)             | <b>&lt;.001</b> |                   |
| <i>Fail to achieve VE90% after first booster dose (T5)</i>    |                                |         |                               |                 |                   |
| HCD4                                                          | 1                              |         | 1                             |                 | 0.937             |
| ICD4                                                          | 1.37 (0.89, 2.13)              | 0.157   | 0.91 (0.41, 2.03)             | 0.814           |                   |
| LCD4                                                          | 2.00 (1.08, 3.72)              | 0.028   | 0.81 (0.24, 2.75)             | 0.733           |                   |
| per 1 SD lower (log2 scale)                                   | 1.42 (1.16, 1.74)              | <.001   | 1.19 (0.78, 1.83)             | 0.421           |                   |
| <b>CD4 count at T1</b>                                        |                                |         |                               |                 |                   |
| <i>Fail to achieve OCOOnAbs after primary cycle (T3)</i>      |                                |         |                               |                 |                   |
| HCD4                                                          | 1                              |         | 1                             |                 | 0.403             |
| ICD4                                                          | 1.67 (1.18, 2.37)              | 0.004   | 1.48 (0.81, 2.68)             | 0.202           |                   |
| LCD4                                                          | 3.08 (1.50, 6.33)              | 0.002   | 1.48 (0.52, 4.23)             | 0.468           |                   |
| per 1 SD lower (log2 scale)                                   | 1.47 (1.23, 1.76)              | <.001   | 1.38 (0.99, 1.93)             | 0.057           |                   |
| <i>Fail to achieve OCOOnAbs after first booster dose (T5)</i> |                                |         |                               |                 |                   |
| HCD4                                                          | 1                              |         | 1                             |                 | 0.925             |
| ICD4                                                          | 1.29 (0.84, 1.98)              | 0.244   | 0.87 (0.40, 1.89)             | 0.730           |                   |
| LCD4                                                          | 1.72 (0.93, 3.19)              | 0.083   | 0.83 (0.26, 2.67)             | 0.759           |                   |
| per 1 SD lower (log2 scale)                                   | 1.35 (1.11, 1.65)              | 0.003   | 1.19 (0.79, 1.80)             | 0.409           |                   |

\*adjusted for age, VL≤50 copies/mL at T1, no. of comorbidities and nadir CD4 count; &from the adjusted model

**Supplementary Table S3.** OR and AOR from fitting a logistic regression model of the probability of failing to achieve a robust/above-average anti-S/RBD response post vaccination VE90% (**Panel A**) and OCOOnAbs (**Panel B**) endpoints after excluding subjects and data quantified with Elecsys Anti-SARS-CoV2 S (Roche)

| Panel A (VE90%)             | Unadjusted<br>Odds ratio (95% CI)                          | p-<br>value | Adjusted*<br>Odds ratio (95% CI) | p-<br>value | &Type<br>III p-<br>value |
|-----------------------------|------------------------------------------------------------|-------------|----------------------------------|-------------|--------------------------|
| <b>CD4/CD8 ratio at T1</b>  | <b>Fail to achieve VE90% after primary cycle (T3)</b>      |             |                                  |             |                          |
| HR                          | 1                                                          |             | 1                                |             | 0.246                    |
| IR                          | 1.21 (0.87, 1.66)                                          | 0.253       | 0.75 (0.42, 1.35)                | 0.346       |                          |
| LR                          | 1.72 (1.25, 2.36)                                          | <.001       | 1.22 (0.66, 2.27)                | 0.526       |                          |
| per 1 SD lower (log2 scale) | 1.32 (1.16, 1.50)                                          | <.001       | 1.18 (0.92, 1.53)                | 0.199       |                          |
|                             | <b>Fail to achieve VE90% after first booster dose (T5)</b> |             |                                  |             |                          |
| HR                          | 1                                                          |             | 1                                |             | 0.474                    |
| IR                          | 1.12 (0.67, 1.89)                                          | 0.659       | 0.58 (0.23, 1.46)                | 0.247       |                          |
| LR                          | 1.50 (0.92, 2.45)                                          | 0.106       | 0.82 (0.33, 2.05)                | 0.677       |                          |
| per 1 SD lower (log2 scale) | 1.31 (1.09, 1.57)                                          | 0.004       | 0.98 (0.68, 1.41)                | 0.921       |                          |

  

| Panel B (OCOOnAbs)          | Unadjusted<br>Odds ratio (95% CI)                             | p-<br>value | Adjusted*<br>Odds ratio (95% CI) | p-<br>value | &Type<br>III p-<br>value |
|-----------------------------|---------------------------------------------------------------|-------------|----------------------------------|-------------|--------------------------|
| <b>CD4/CD8 ratio at T1</b>  | <b>Fail to achieve OCOOnAbs after primary cycle (T3)</b>      |             |                                  |             |                          |
| HR                          | 1                                                             |             | 1                                |             | 0.834                    |
| IR                          | 0.99 (0.69, 1.41)                                             | 0.941       | 0.89 (0.49, 1.61)                | 0.699       |                          |
| LR                          | 1.26 (0.89, 1.80)                                             | 0.193       | 1.06 (0.56, 2.02)                | 0.853       |                          |
| per 1 SD lower (log2 scale) | 1.18 (1.02, 1.36)                                             | 0.024       | 1.02 (0.78, 1.34)                | 0.878       |                          |
|                             | <b>Fail to achieve OCOOnAbs after first booster dose (T5)</b> |             |                                  |             |                          |
| HR                          | 1                                                             |             | 1                                |             | 0.396                    |
| IR                          | 0.97 (0.59, 1.60)                                             | 0.900       | 0.65 (0.27, 1.56)                | 0.332       |                          |
| LR                          | 1.35 (0.84, 2.16)                                             | 0.216       | 1.06 (0.44, 2.55)                | 0.898       |                          |
| per 1 SD lower (log2 scale) | 1.27 (1.06, 1.52)                                             | 0.009       | 1.09 (0.77, 1.54)                | 0.635       |                          |

\*adjusted for age, VL≤50 copies/mL at T1, no. of comorbidities and nadir CD4 count; &from the adjusted model

**Supplementary Table S4.** Adjusted mean anti-RBD values from fitting a mixed-linear model EXCLUDING subjects and data quantified with Elecsys Anti-SARS-CoV2 S (Roche)

| anti-RBD,<br>log2              | T1<br>95% CI      | T2<br>95% CI   | T3<br>95% CI    | T4<br>95% CI   | T5<br>95% CI   | T6<br>95% CI   | p-<br>value*    |
|--------------------------------|-------------------|----------------|-----------------|----------------|----------------|----------------|-----------------|
| <b>CD4 at T1</b>               |                   |                |                 |                |                |                | <b>&lt;.001</b> |
| <b>LCD4</b>                    | -4.8 (-5.7, -4.0) | 1.0 (0.2, 1.8) | 4.8 (4.0, 5.6)  | 2.4 (1.6, 3.3) | 8.0 (7.1, 8.9) | 5.6 (4.2, 7.0) |                 |
| <b>ICD4</b>                    | -5.2 (-5.7, -4.7) | 3.2 (2.7, 3.7) | 9.1 (8.5, 9.6)  | 7.0 (6.6, 7.5) | 8.2 (7.3, 9.0) | 4.4 (3.9, 5.0) |                 |
| <b>HCD4</b>                    | -4.8 (-5.2, -4.4) | 4.3 (3.9, 4.7) | 9.1 (8.6, 9.6)  | 7.4 (7.0, 7.7) | 7.7 (6.8, 8.6) | 4.7 (4.3, 5.2) |                 |
| <b>CD4/CD8<br/>ratio at T1</b> |                   |                |                 |                |                |                | <b>0.012</b>    |
| <b>HR</b>                      | -4.9 (-5.4, -4.5) | 2.8 (2.4, 3.2) | 6.5 (6.1, 6.9)  | 3.7 (3.3, 4.2) | 8.7 (8.2, 9.2) | 7.3 (6.5, 8.0) |                 |
| <b>IR</b>                      | -5.0 (-5.6, -4.4) | 4.0 (3.4, 4.5) | 9.2 (8.5, 9.8)  | 7.2 (6.7, 7.7) | 8.0 (6.8, 9.3) | 4.7 (4.1, 5.3) |                 |
| <b>LR</b>                      | -4.9 (-5.5, -4.3) | 4.4 (3.8, 4.9) | 9.3 (8.5, 10.0) | 7.4 (6.9, 7.8) | 7.7 (6.4, 9.0) | 5.1 (4.4, 5.7) |                 |

\*F-test type 3 interaction p-value

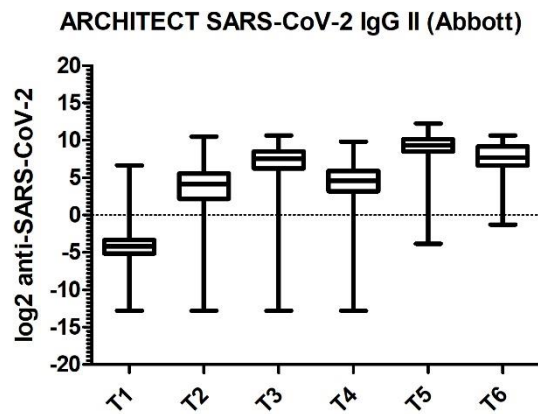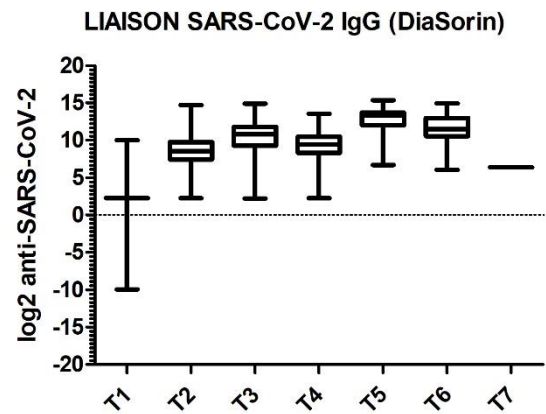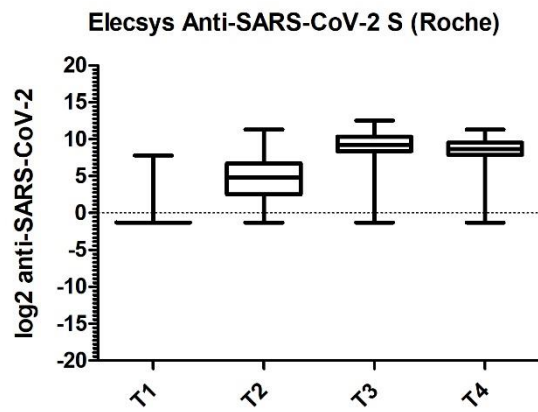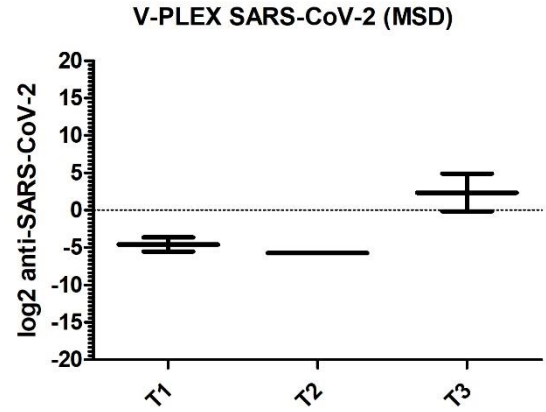

**Supplementary Figure S1.** Boxplots of Anti-SARS-CoV-2 titers (log2 transformation) according to the assay used

**Supplementary Table S5.** Median (IQR) quantification of anti-SARS-CoV-2 titers (log2 transformation) at different time points after vaccination according to immunoassay used and CD4 strata **(A)** and CD4/CD8 strata **(B)**

| <i>Architect anti-SARS-CoV-2 IgG II (Abbott), anti-RBD IgG, log2, median (IQR)</i>  |                      |                    |                     |                    |                      |                      |
|-------------------------------------------------------------------------------------|----------------------|--------------------|---------------------|--------------------|----------------------|----------------------|
| <b>(A)</b>                                                                          | <b>T1</b>            | <b>T2</b>          | <b>T3</b>           | <b>T4</b>          | <b>T5</b>            | <b>T6</b>            |
| <b>CD4 at T1</b>                                                                    |                      |                    |                     |                    |                      |                      |
| <b>HCD4</b>                                                                         | -4.14 (-5.14, -3.33) | 4.61 (3.3, 5.76)   | 7.73 (6.59, 8.65)   | 4.86 (3.76, 6.01)  | 9.35 (8.55, 9.89)    | 7.71 (6.88, 8.89)    |
| <b>ICD4</b>                                                                         | -4.55 (-5.14, -3.55) | 3.92 (1.51, 5.3)   | 7.35 (6.21, 8.52)   | 4.54 (3.02, 6.15)  | 9.56 (8.74, 10.48)   | 8.44 (7.11, 9.6)     |
| <b>LCD4</b>                                                                         | -3.82 (-4.55, -3.33) | 1.59 (-0.97, 3.61) | 6.17 (3.83, 7.46)   | 3.19 (1.81, 4.9)   | 9.27 (7.64, 10.03)   | 5.68 (5.36, 7.36)    |
| <i>Liaison SARS-CoV-2 IgG (Diasorin), anti-S IgG, log2, median (IQR) anti-S IgG</i> |                      |                    |                     |                    |                      |                      |
|                                                                                     | <b>T1</b>            | <b>T2</b>          | <b>T3</b>           | <b>T4</b>          | <b>T5</b>            | <b>T6</b>            |
| <b>HCD4</b>                                                                         | 2.26 (2.26, 2.26)    | 8.77 (7.73, 9.76)  | 10.88 (9.43, 11.8)  | 9.44 (8.33, 10.28) | 13.29 (12.02, 13.7)  | 11.29 (10.39, 13.21) |
| <b>ICD4</b>                                                                         | 2.26 (2.26, 2.26)    | 7.98 (6.79, 9.64)  | 10.75 (8.71, 11.79) | 9.73 (8.61, 10.74) | 13.04 (11.31, 13.68) | 11.54 (10.87, 12.78) |
| <b>LCD4</b>                                                                         | 2.26 (2.26, 2.98)    | 6.4 (3.52, 7.82)   | 9.19 (5.17, 11.71)  | 9.56 (6.48, 10.77) | 13.27 (12.33, 14.33) | 11.82 (10.56, 12.97) |
| <i>Architect anti-SARS-CoV-2 IgG II (Abbott), anti-RBD IgG, log2, median (IQR)</i>  |                      |                    |                     |                    |                      |                      |
| <b>(B)</b>                                                                          | <b>T1</b>            | <b>T2</b>          | <b>T3</b>           | <b>T4</b>          | <b>T5</b>            | <b>T6</b>            |
| <b>CD4/CD8 ratio at T1</b>                                                          |                      |                    |                     |                    |                      |                      |
| <b>HR</b>                                                                           | -4.35 (-5.14, -3.33) | 4.64 (3.49, 5.83)  | 7.7 (6.62, 8.56)    | 4.97 (3.82, 6.02)  | 9.35 (8.59, 9.89)    | 7.59 (6.88, 8.77)    |
| <b>IR</b>                                                                           | -4.35 (-5.14, -3.55) | 4.62 (2.95, 5.73)  | 7.42 (6.16, 8.64)   | 4.82 (3.72, 6.00)  | 9.35 (8.62, 9.95)    | 7.95 (7.11, 9.76)    |
| <b>LR</b>                                                                           | -4.14 (-5.14, -3.33) | 3.41 (1.01, 5.1)   | 7.32 (5.81, 8.43)   | 4.37 (2.79, 5.56)  | 9.52 (8.24, 10.26)   | 7.66 (6.05, 9.18)    |
| <i>Liaison SARS-CoV-2 IgG (Diasorin), anti-S IgG, log2, median (IQR)</i>            |                      |                    |                     |                    |                      |                      |
|                                                                                     | <b>T1</b>            | <b>T2</b>          | <b>T3</b>           | <b>T4</b>          | <b>T5</b>            | <b>T6</b>            |
| <b>HR</b>                                                                           | 2.26 (2.26, 2.26)    | 8.81 (8.04, 9.72)  | 10.72 (9.13, 11.63) | 9.44 (8.27, 10.2)  | 13.36 (11.41, 13.61) | 11.22 (10.12, 12.92) |
| <b>IR</b>                                                                           | 2.26 (2.26, 2.26)    | 8.51 (7.42, 9.67)  | 10.88 (9.46, 11.79) | 9.62 (8.61, 10.34) | 13.08 (12.35, 14)    | 11.7 (10.56, 13.44)  |
| <b>LR</b>                                                                           | 2.26 (2.26, 2.26)    | 8.04 (6.48, 9.76)  | 10.87 (9.36, 12.17) | 9.54 (7.98, 10.74) | 13.08 (11.46, 13.85) | 11.54 (10.79, 12.78) |
